# Supplementary material for: Antisolvent solubilization achieves simultaneous passivation of shallow and deep defects in perovskite solar cells
Source: Royal Society of Chemistry journal article supplement (doi:10.1039/d3qi02231e), 2024-01-01
Supplement: d3qi02231e1.pdf [file d3qi02231e1.pdf]

## Supporting Information

### **Antisolvent Solubilization Achieves Simultaneous Passivation of Shallow and Deep Defects in Perovskite Solar Cells**

Chu Zhang<sup>1</sup>, Chunying Ma<sup>1</sup>, Shennan Chen<sup>1</sup>, Tingli Ma<sup>1,2,\*</sup>

<sup>1</sup> Department of Materials Science and Engineering, China Jiliang University, Hangzhou, 310018, P. R. China.

<sup>2</sup> Graduate School of Life Science and Systems Engineering, Kyushu Institute of Technology, Kitakyushu, Fukuoka 808-0196, Japan.

#### **Corresponding Authors**

\*Tingli Ma

E-mail: [matingli123@cjlu.edu.cn](mailto:matingli123@cjlu.edu.cn);

**Table S1.** The average grain size of perovskite deposited on different perovskite films, the data calculated from the SEM images (3\*3  $\mu\text{m}$ ).

| Samples          | Average crystallite size (nm) |
|------------------|-------------------------------|
| OIHPs without AS | 195.74                        |
| OIHPs with AS    | 265.16                        |

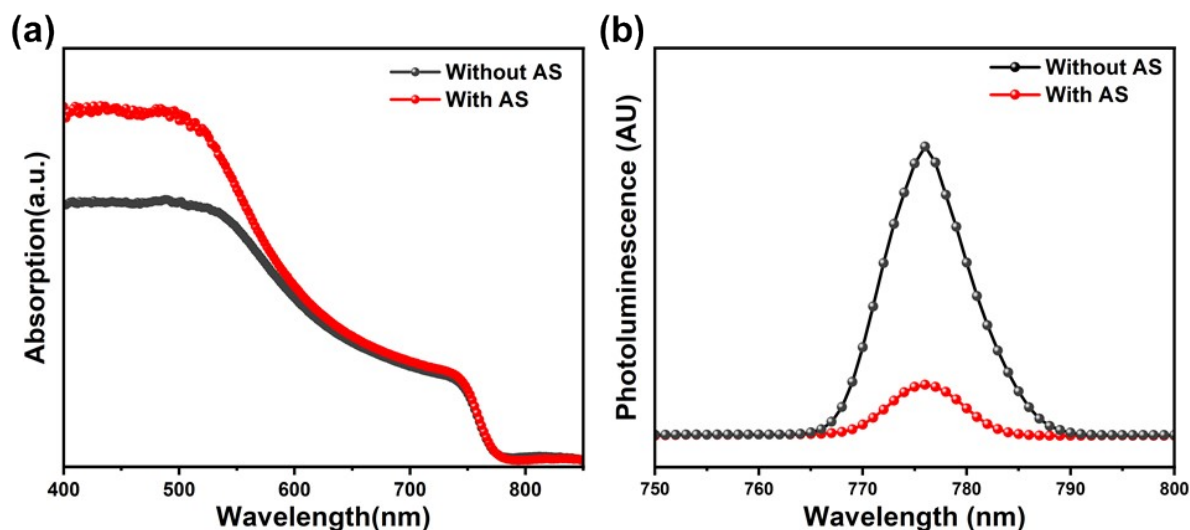

**Fig. S1.** (a) UV-vis spectra of the OIHPs prepared without AS and with AS method; (b) PL spectra of the OIHPs prepared without AS and with AS method on FTO/SnO<sub>2</sub>.

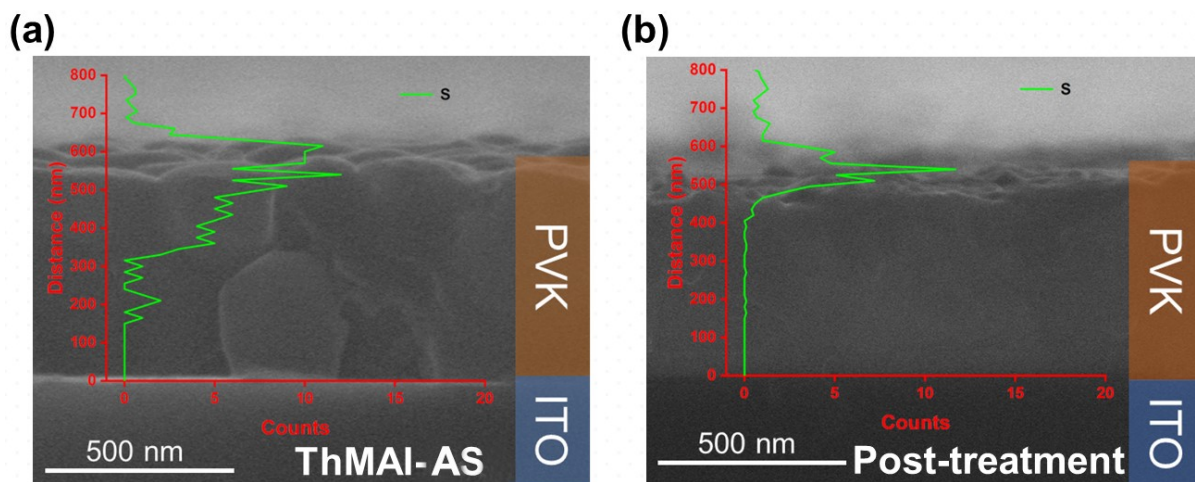

**Fig. S2.** Cross-section images and EDS mapping of perovskite film modified by (a) AS method and (b) post-treatment method.

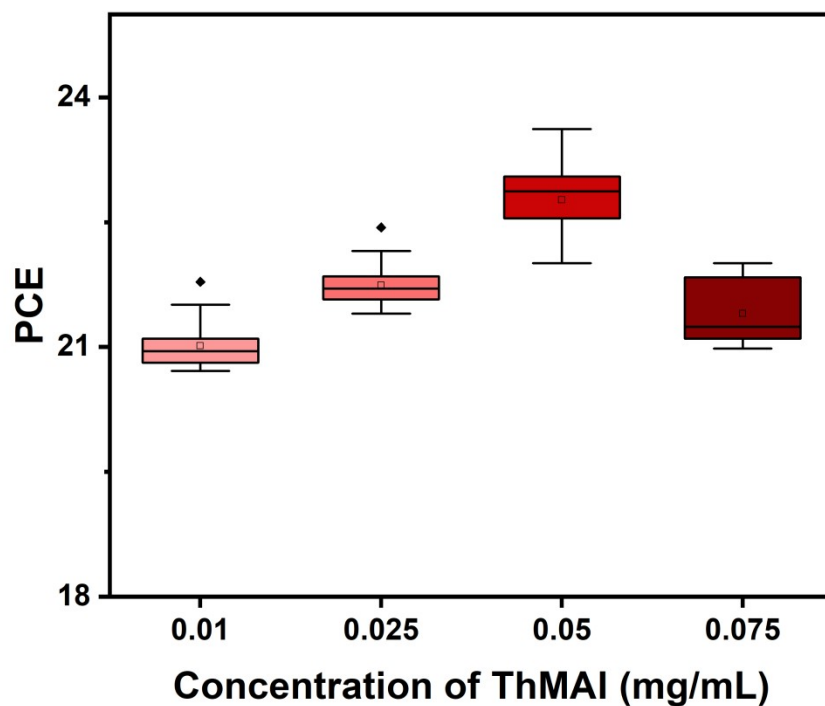

**Fig. S3.** Box charts of PCE of PSCs prepared with AS method varied with the concentration of ThMAI in the antisolvent Chlorobenzene.

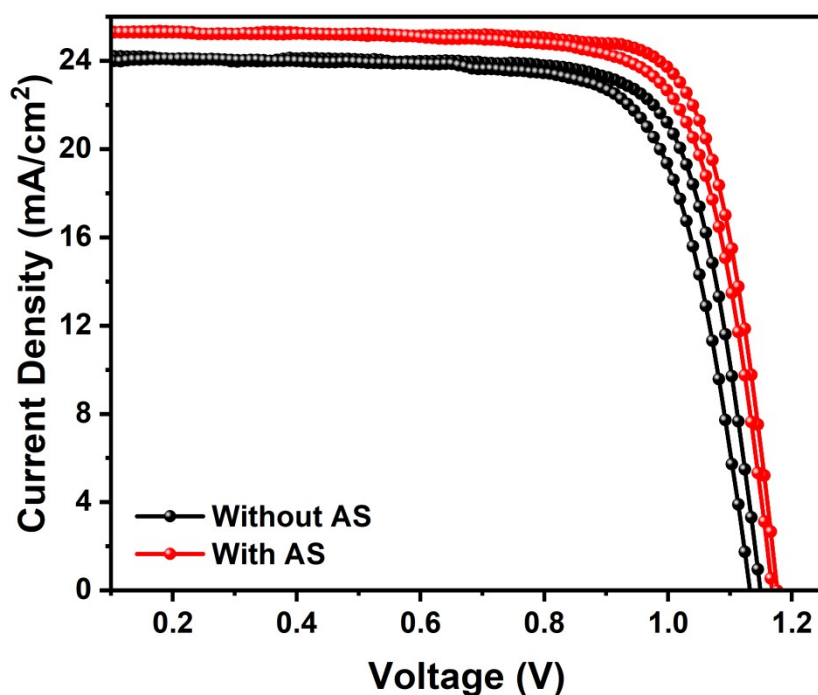

**Fig. S4.** J–V curves of PSCs prepared without and with AS method measured under reverse and forward scan (The test condition was that active area ( $0.15 \text{ cm}^2$ ) was defined by a black mask, where scan rate was  $0.2 \text{ V/s}$  for both reverse and forward scan.).

**Table S2.** Statistical photovoltaic parameters of PSCs (25 cells) fabricated using different methods.

| Methods    |          | $V_{oc}/V$ | $J_{sc}/mA \cdot cm^{-2}$ | FF        | PCE/%      |
|------------|----------|------------|---------------------------|-----------|------------|
| Without AS | Average  | 1.10±0.04  | 23.37±0.96                | 0.73±0.06 | 19.81±0.73 |
|            | Champion | 1.14       | 24.21                     | 0.78      | 21.53      |
| With AS    | Average  | 1.15±0.03  | 25.01±0.42                | 0.76±0.04 | 22.64±1.67 |
|            | Champion | 1.17       | 25.31                     | 0.80      | 23.69      |

**Table S3.** Carrier transport dynamics fitting results of PSCs based on different OIHPs films.

| Measurements | Parameter |          | OIHPs without AS | OIHPs with AS |
|--------------|-----------|----------|------------------|---------------|
| EIS          | $R_s$     | $\Omega$ | 12.14            | 11.96         |
|              | $R_{tr}$  | $\Omega$ | 24.05            | 18.64         |
|              | $R_{rec}$ | $\Omega$ | 106.25           | 115.77        |
| TPV          | $\tau_L$  | $\mu s$  | 51.6             | 67.4          |
| TPC          | $\tau_t$  | $\mu s$  | 14.5             | 12.3          |

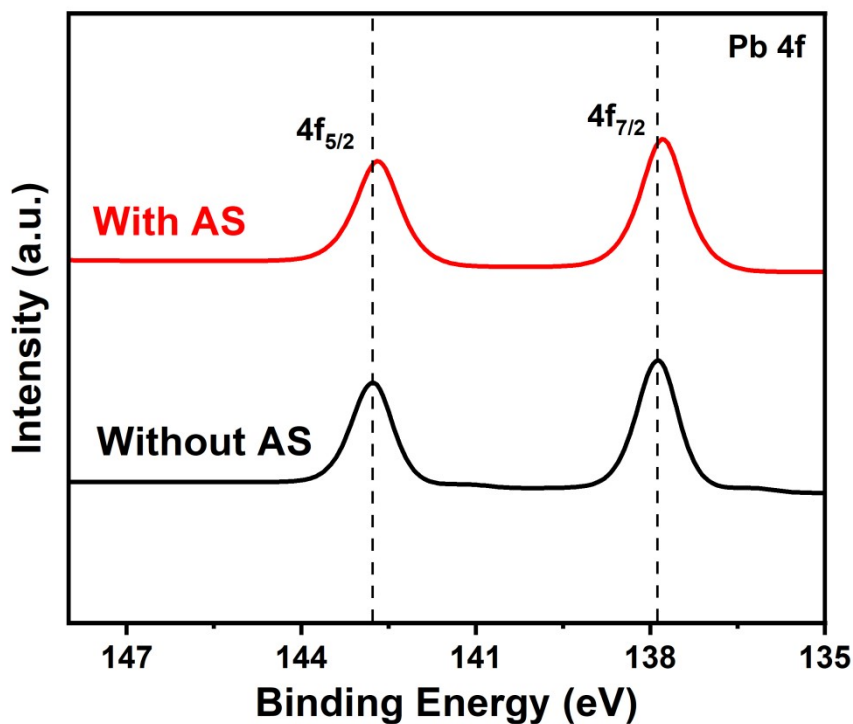

**Fig. S5.** Pb 4f spectra for OIHPs films prepared without and with AS method.
